# Supplementary material for: Which molecular properties determine the impact sensitivity of an explosive? A machine learning quantitative investigation of nitroaromatic explosives
Source: Royal Society of Chemistry journal article supplement (doi:10.1039/d2cp05339j), 2023-01-01
Supplement: d2cp05339j1.pdf [file d2cp05339j1.pdf]

## Supporting Information

### Which molecular properties determine the impact sensitivity of an explosive?

#### A machine learning quantitative investigation of nitroaromatic explosives†

Julio Cesar Duarte,<sup>a,b</sup> Romulo Dias da Rocha,<sup>b</sup> Itamar Borges Jr.,<sup>a,c,\*</sup>

<sup>a</sup> Departamento de Engenharia de Computação, Instituto Militar de Engenharia.

<sup>b</sup> Programa de Pós-Graduação em Engenharia de Defesa, Militar de Engenharia.

<sup>c</sup> Departamento de Química, Militar de Engenharia.

Instituto Militar de Engenharia, Praça General Tibúrcio, 80, Urca, Rio de Janeiro (RJ), 22290-270, Brazil: E-mail: [itamar@ime.eb.br](mailto:itamar@ime.eb.br)

**Scheme 1S** – The 53 investigated nitroaromatic molecules. The acronyms of the molecules are identified in Table 1S of this Electronic Supplementary Information. The colored molecules comprise the test set.

**Table 1S** – Acronyms and names of the 53 molecules.

**Table 2S** – Input data for the algorithms: the four features (molecular properties) and the target-features ( $h_{50}$  values).

**Table 3S** – The 42 different algorithms tested employing the Lazy Predict Tool, and the respective root mean square errors (RMSE).

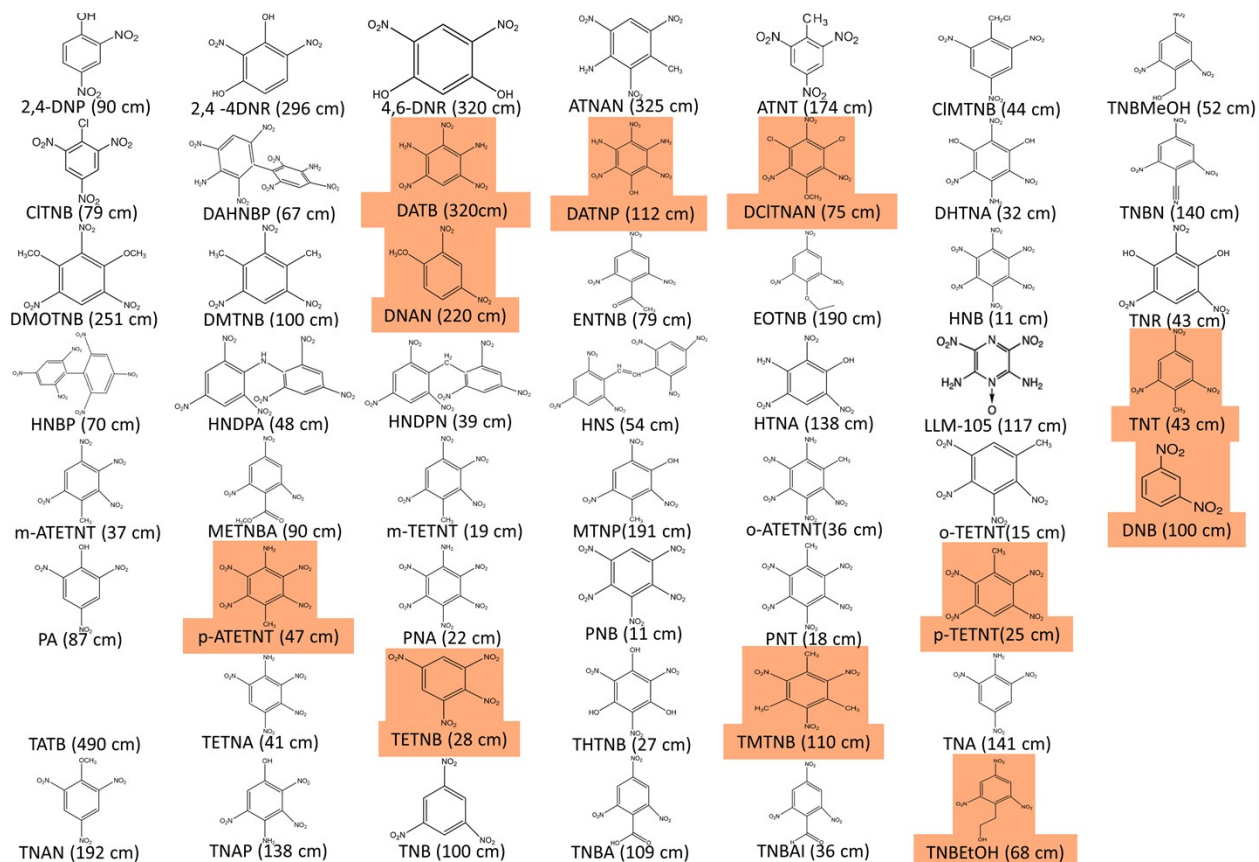

**Scheme 1S** – The 53 investigated nitroaromatic molecules. The acronyms of the molecules are identified in Table 1S of this Electronic Supplementary Information. The colored molecules comprise the test set.

**Table 1S** – Acronyms and names of the 53 molecules.

2,4-DNP - 2,4-dinitrophenol  
2,4-DNR – 2,4-dinitroresorcinol  
4,6-DNR – 4,6-dinitroresorcinol  
ATNAN – 3-amino-2,4,6-trinitroanisole  
ATNT – 3-amino-2,4,6-trinitrotoluene  
CIMTNB – Chloromethyl-2,4,6-trinitrobenzene  
CITNB – Chloro-2,4,6-trinitrobenzene  
DAHNB – 3,3'-diamino-2,2',4,4',6,6'-hexanitro-biphenyl  
DATB – 1,3-diamino-2,4,6-trinitrobenzene  
DATNP – 3,5 diamino- 2,4,6-trinitro-phenol  
DCITNAN – 3,5-dichloro-2,4,6-trinitroanisole  
DHTNA – 3,5-dihydroxy-2,4,6-trinitroaniline  
DMOTNB – 1,3-dimethoxy-2,4,6-trinitrobenzene  
DMTNB – 1,3-dimethyl-2,4,6-trinitrobenzene  
DNAN – 2,4-dinitroanisole  
DNB – 1,3-dinitro-benzene  
ENTNB – 2,4,6-trinitrophenylethanone  
EOTNB – Ethoxy-2,4,6-trinitrobenzene  
HNB – Hexanitrobenzene  
HNBP – 2,2',4,4',6,6'-hexanitrobiphenyl  
HNDPA – 2,2',4,4',6,6'- hexanitrodiphenylamine (dipicrylamine)  
HNDPM – 2,2',4,4',6,6'- hexanitrodiphenylmethane  
HNS – 2,2',4,4',6,6'- hexanitrostilbene  
HTNA – 3-hydroxy-2,4,6-trinitroaniline  
LLM-105 – 2,6-diamino-3,5-dinitropyrazine-1-oxide  
m-ATETNT – 3-aminotetranitrotoluene  
METNBA – 3-methylester-2,4,6-trinitrobenzoic acid  
m-TETNT – 2,3,4,6-tetranitrotoluene  
MTNP – 3-methyl-2,4,6-trinitrophenol  
o-ATETNT – 2-aminotetranitrotoluene  
o-TETNT – 2,3,4,5-tetranitrotoluene  
PA – 2,4,6-trinitrophenol (picric acid)  
p-ATETNT – 4-aminotetranitrotoluene  
PNA – Pentanitroaniline  
PNB – Pentanitrobenzene  
PNT – Pentanitrotoluene  
p-TETNT – 4-aminotetranitrotoluene  
TATB – 1,3,5-triamino-2,4,6-trinitrobenzene  
TETNA – 2,3,4,6-tetranitroaniline  
TETNB – 1,2,3,5-tetranitrobenzene

THTNB – 1,3,5-trihydroxy-2,4,6-trinitrobenzene  
TMTNB – 1,3,5-trimethyl-2,4,6-trinitrobenzene  
TNA – 2,4,6-trinitroaniline  
TNAN – 2,4,6-trinitroanisole  
TNAP – 4-amino-2,3,5-trinitrophenol  
TNB – 1,3,5-trinitrobenzene  
TNBA – 2,4,6-trinitrobenzoic acid  
TNBAI – 2,4,6-trinitrobenzaldehyde  
TNBEtOH – 2,4,6-trinitrobenzeneethanol  
TNBMeOH – 2,4,6-trinitrobenzenemethanol  
TNBN – 2,4,6-trinitrobenzonitrile  
TNR – 2,4,6-trinitroresorcinol  
TNT – 2,4,6-trinitrotoluene

**Table 2S** – Input data for the algorithms: the four features (molecular properties) and the target-features ( $h_{50}$  values).

| Molecule | $\sum Q_0(NO_2)$ | $\sum Q_1(NO_2)$ | $\sum Q_2(C)$ | #NO <sub>2</sub> | $h_{50}$ (cm) |
|----------|------------------|------------------|---------------|------------------|---------------|
| 2,4-DNP  | 0.578            | 1.98             | 7.022         | 2                | 90            |
| 2,4-DNR  | 0.547            | 1.908            | 7.095         | 2                | 296           |
| 4,6-DNR  | 0.584            | 1.942            | 7.092         | 2                | 320           |
| ATNAN    | 0.88             | 2.995            | 7.242         | 3                | 325           |
| ATNT     | 0.934            | 2.998            | 7.127         | 3                | 174           |
| CLMTNB   | 0.822            | 2.995            | 6.981         | 3                | 44            |
| CLTNB    | 0.789            | 2.991            | 6.762         | 3                | 79            |
| DAHNBP   | 1.293            | 5.354            | 13.233        | 6                | 67            |
| DATB     | 1.011            | 2.963            | 7.343         | 3                | 320           |
| DATNP    | 0.972            | 2.884            | 7.016         | 3                | 112           |
| DCLTNAN  | 0.78             | 2.9              | 6.942         | 3                | 75            |
| DHTNA    | 0.842            | 2.829            | 7.133         | 3                | 32            |
| DMOTNB   | 0.785            | 2.994            | 7.069         | 3                | 251           |
| DMTNB    | 0.89             | 2.974            | 6.925         | 3                | 100           |
| DNAN     | 0.542            | 1.976            | 7.169         | 2                | 220           |
| DNB      | 0.569            | 2.021            | 6.972         | 2                | 100           |
| ENTNB    | 0.754            | 3.022            | 6.863         | 3                | 79            |
| EOTNB    | 0.792            | 2.948            | 6.988         | 3                | 190           |
| HNB      | 0.696            | 5.406            | 6.444         | 6                | 11            |
| HNBP     | 1.385            | 5.774            | 12.737        | 6                | 70            |
| HNDPA    | 1.486            | 5.798            | 13.227        | 6                | 48            |
| HNDPM    | 0.978            | 5.479            | 13.228        | 6                | 39            |
| HNS      | 1.47             | 5.944            | 13.78         | 6                | 54            |
| HTNA     | 0.839            | 2.906            | 7.157         | 3                | 138           |
| LLM-105  | 0.47             | 1.948            | 6.513         | 2                | 117           |
| m-ATETNT | 0.915            | 3.819            | 6.969         | 4                | 37            |
| METNBA   | 0.688            | 2.918            | 6.684         | 3                | 90            |
| m-TETNT  | 0.827            | 3.816            | 6.704         | 4                | 19            |
| MTNP     | 0.803            | 2.952            | 6.927         | 3                | 191           |
| o-ATET   | 0.784            | 3.758            | 6.976         | 4                | 36            |
| o-TETNT  | 0.718            | 3.752            | 6.684         | 4                | 15            |
| PA       | 0.739            | 2.899            | 6.86          | 3                | 87            |
| PATETNT  | 0.907            | 3.816            | 6.981         | 4                | 47            |
| PNA      | 0.835            | 4.615            | 6.811         | 5                | 22            |
| PNB      | 0.73             | 4.589            | 6.511         | 5                | 11            |
| PNT      | 0.806            | 4.632            | 6.608         | 5                | 18            |
| p-TETNT  | 0.824            | 3.795            | 6.724         | 4                | 25            |
| TATB     | 1.131            | 2.931            | 7.518         | 3                | 490           |

|                     |       |       |       |   |     |
|---------------------|-------|-------|-------|---|-----|
| TETNA               | 0.866 | 3.796 | 6.935 | 4 | 41  |
| TETNB               | 0.757 | 3.78  | 6.63  | 4 | 28  |
| THTNB               | 0.694 | 2.776 | 6.979 | 3 | 27  |
| TMTNB               | 0.934 | 2.95  | 6.99  | 3 | 110 |
| TNA                 | 0.833 | 2.975 | 7.091 | 3 | 141 |
| TNAN                | 0.775 | 2.968 | 6.956 | 3 | 192 |
| TNAP                | 0.761 | 2.89  | 7.032 | 3 | 138 |
| TNB                 | 0.765 | 2.97  | 6.799 | 3 | 100 |
| TNBA                | 0.676 | 2.895 | 6.673 | 3 | 109 |
| TNBAL               | 0.704 | 2.222 | 6.728 | 3 | 36  |
| TNB <sub>EtOH</sub> | 0.835 | 3.007 | 6.866 | 3 | 68  |
| TNB <sub>MeOH</sub> | 0.798 | 2.944 | 6.774 | 3 | 52  |
| TNBN                | 0.658 | 2.882 | 6.667 | 3 | 140 |
| TNR                 | 0.711 | 2.854 | 6.941 | 3 | 43  |
| TNT                 | 0.83  | 2.989 | 6.849 | 3 | 98  |

**Table 3S** – The 42 different algorithms tested employing the Lazy Predict Tool, and the respective root mean square errors (RMSE).

| <b>Algorithms</b>             | <b>RMSE (cm)</b> |
|-------------------------------|------------------|
| XGBRegressor                  | 25.65            |
| RandomForestRegressor         | 27.25            |
| ExtraTreesRegressor           | 30.83            |
| AdaBoostRegressor             | 31.68            |
| BaggingRegressor              | 32.08            |
| GradientBoostingRegressor     | 39.25            |
| DecisionTreeRegressor         | 46.05            |
| ExtraTreeRegressor            | 46.54            |
| PoissonRegressor              | 58.02            |
| KNeighborsRegressor           | 60.52            |
| PassiveAggressiveRegressor    | 62.47            |
| HuberRegressor                | 63.32            |
| SGDRegressor                  | 69.63            |
| LinearRegression              | 70.00            |
| TransformedTargetRegressor    | 70.00            |
| Lars                          | 70.00            |
| OrthogonalMatchingPursuitCV   | 70.02            |
| LassoLarsIC                   | 70.03            |
| Ridge                         | 70.08            |
| Lasso                         | 70.18            |
| BayesianRidge                 | 70.51            |
| LarsCV                        | 70.84            |
| LassoLarsCV                   | 70.84            |
| ElasticNetCV                  | 71.12            |
| LassoCV                       | 71.82            |
| LassoLars                     | 71.9             |
| RidgeCV                       | 73.83            |
| GammaRegressor                | 74.64            |
| ElasticNet                    | 76.33            |
| NuSVR                         | 76.70            |
| RANSACRegressor               | 76.71            |
| SVR                           | 76.73            |
| OrthogonalMatchingPursuit     | 78.76            |
| GeneralizedLinearRegressor    | 78.79            |
| TweedieRegressor              | 78.79            |
| HistGradientBoostingRegressor | 82.70            |
| DummyRegressor                | 82.70            |
| LGBMRegressor                 | 82.70            |
| KernelRidge                   | 93.12            |
| LinearSVR                     | 95.37            |
| MLPRegressor                  | 109.34           |

|                          |         |
|--------------------------|---------|
| GaussianProcessRegressor | 3295.80 |
|--------------------------|---------|
